# Supplementary material
Source: publisher figshare collection journal article supplement (https://geolsoc.figshare.com/articles/dataset/_/3454670)

A.

Quad (=Ca, Mg, Fe-px)

■ Moe  
○ Roe

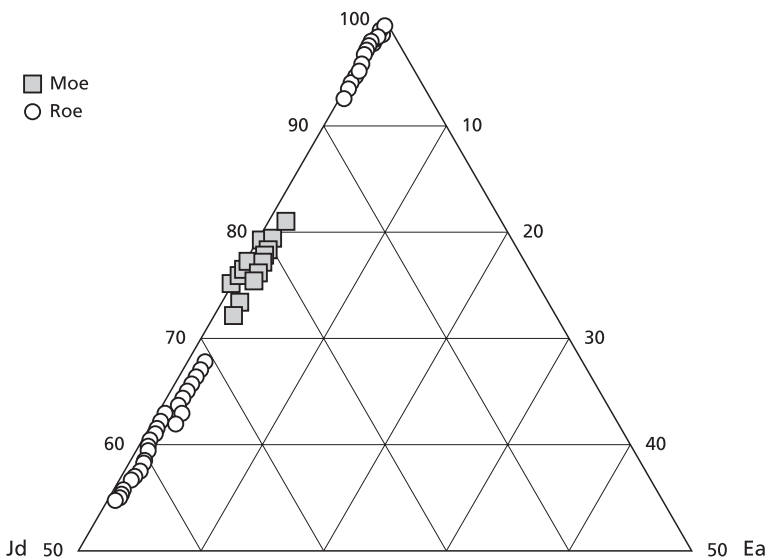

B.

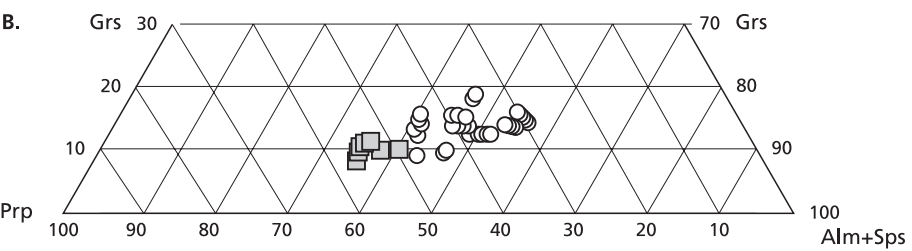

C.

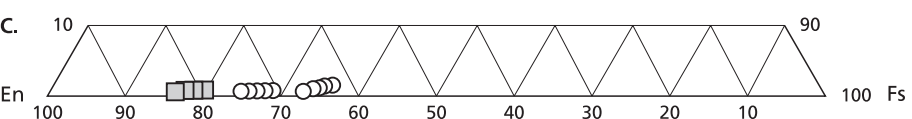

Supplement: Supplementary file 1 [file 1]
